# Supplementary material for: Controlled photostability of luminescent nanocrystalline ZnO solution for selective detection of aldehydes
Source: Royal Society of Chemistry journal article supplement (doi:10.1039/b613043g), 2007-01-01
Supplement: b613043g.pdf [file b613043g.pdf]

## Electronic Supplementary Information

### Controlled photostability of luminescent nanocrystalline ZnO solution for selective detection of aldehydes

Nikhil R. Jana, Hsiao-hua Yu, Emril Mohamed Ali, Yuangang Zheng and Jackie Y. Ying\*

*Institute of Bioengineering and Nanotechnology  
31 Biopolis Way, The Nanos, Singapore 138669*

#### Experimental

**Materials and Reagents.** All the chemicals were purchased from commercial sources (Sigma-Aldrich, Lancaster, Alfa Aesar and Gelest), and used without further purification, unless otherwise noted.

**Synthesis of Silane-Functionalized ZnO Nanocrystals.** The ZnO nanocrystals were synthesized similar to the procedures reported.<sup>1</sup> Zinc acetate (220 mg) was dissolved in ethanol (20 mL) in an Erlenmeyer flask, and oleic acid (70  $\mu$ L) was added. In a separate flask, TMAH (360 mg) was dissolved in ethanol (5 mL). Both solutions were heated to boiling and mixed together quickly as a clear solution. The reaction mixture was kept boiling for exactly 2 min, and was stopped with the addition of 50 mL of ethanol. The reaction mixture was then cooled immediately in an ice bath at 0°C. ZnO precipitates were centrifuged, collected, and redissolved in toluene (10 mL). The two-stage silanization was illustrated using N-(2-aminoethyl)aminopropyltrimethoxysilane (AEAPS) as an example. 0.1 M AEAPS solution in toluene (1 mL) and 0.1 M TMAH solution (1 mL) were added to the ZnO solution in toluene. The reaction mixture was stirred and heated to 85°C for 15 min. It was centrifuged and washed three times with toluene to remove excess oleic acid. The precipitates were redispersed in toluene. 0.1 M TMAH solution (1 mL) was then added. The reaction mixture was heated to 85°C for 30 min. The functionalized ZnO nanocrystals were then centrifuged, collected, and dried in vacuum oven overnight. The nanocrystals (~ 30 mg) were dissolved in 10 mL of deionized water. If necessary, formic acid (1 M) was added dropwise to increase the solubility of the nanocrystals. The stock solution was then filtered

---

(1) Jana, N. R.; Chen, Y.; Peng, X. *Chem. Mater.* **2004**, *16*, 3931.

with a 0.2- $\mu\text{m}$  membrane syringe filter prior to use. The concentration of nanocrystalline  $\text{NH}_2\text{-ZnO}$  solution was quantified by UV-visible spectrometry at a wavelength of 330 nm. The  $\text{NH}_2\text{-ZnO}$  solution should be diluted to the desired concentration right before the experiment since it was most stable at  $\sim 3$  mg/mL.

**Optical Property Measurement.** Absorption spectra of samples were measured at room temperature on an Agilent 8453 UV-visible spectrometer. Luminescence spectra were measured at room temperature on a Jobin Yvon Horiba Fluorolog spectrometer.

**High-Throughput Screening.** Sample compounds were dissolved in DMSO, and 75  $\mu\text{L}$  of the sample solution were mixed with an aqueous solution of  $\text{NH}_2\text{-ZnO}$  nanocrystals (5  $\mu\text{g/mL}$ , 75  $\mu\text{L}$ ) in a 96-well plate. The plate was then exposed to UV light ( $\lambda_{\text{max}} = 365$  nm, 50 W) from a flat-panel transilluminator (Wealtec) for 2 min. The luminescence intensity at 545 nm (excited at 345 nm) was recorded by a microplate reader (Tecan).

**Scheme S1.** Two-stage silanization of ZnO nanocrystals

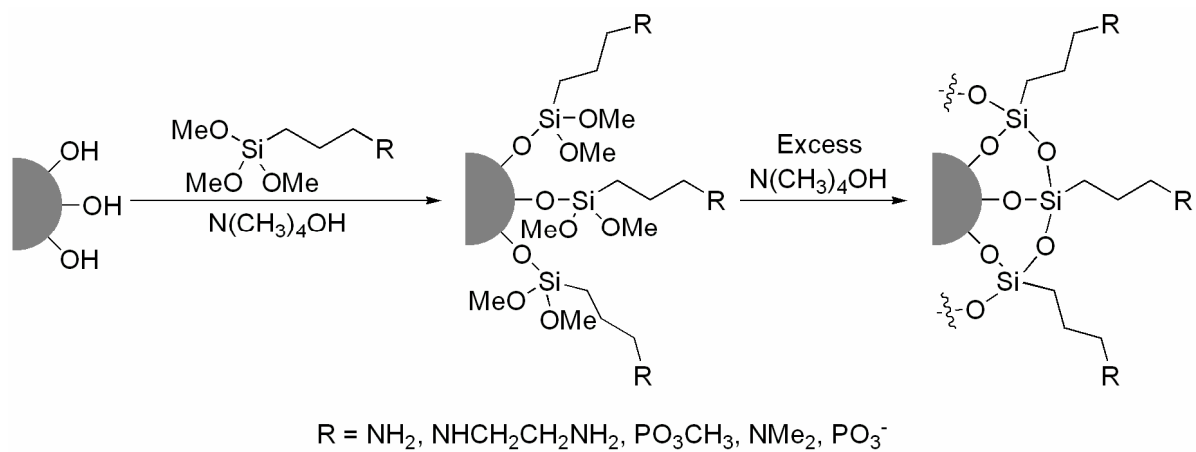

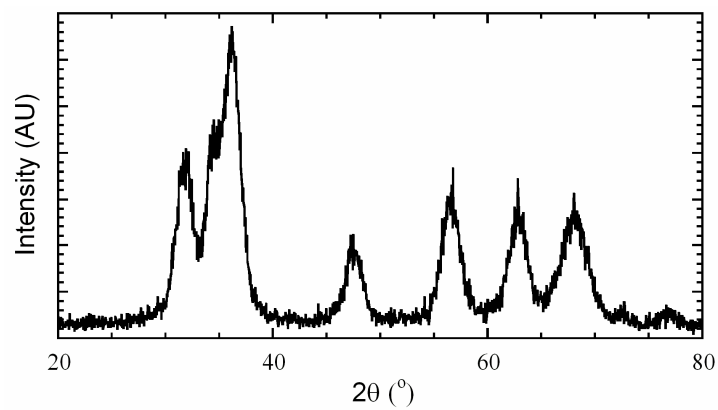

**Figure S1.** XRD pattern of AEAPS-functionalized ZnO nanocrystals.

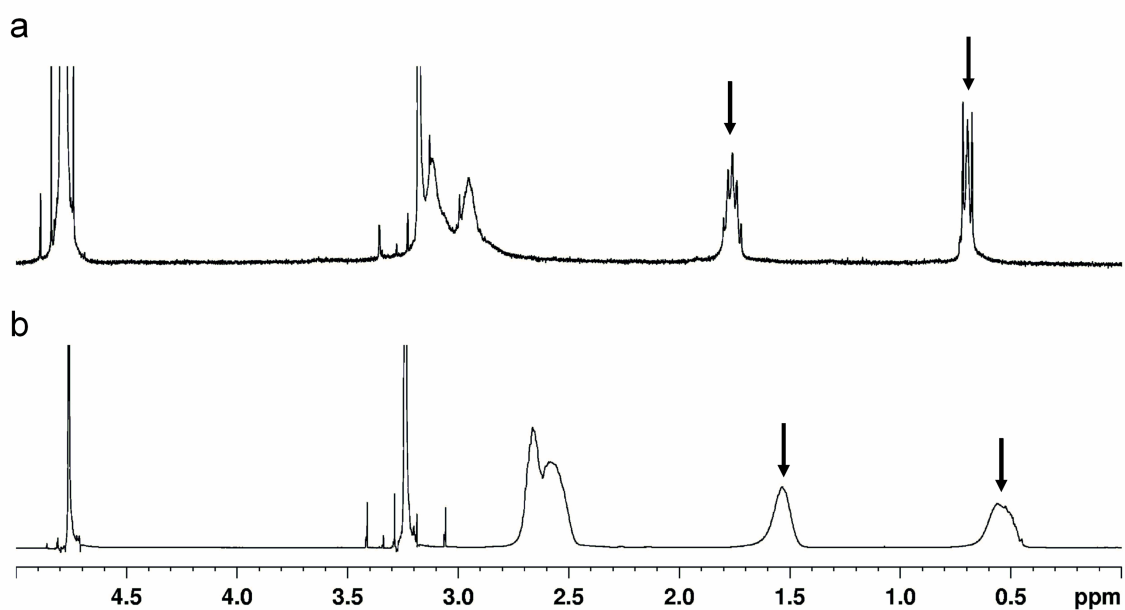

**Figure S2.** NMR spectra of (a) AEAPS-functionalized ZnO nanocrystals, and (b) AEAPS in D<sub>2</sub>O containing 0.16% formic acid. The NMR signals marked with an arrow are attributed to the first two Si-adjacent CH<sub>2</sub> species of the -Si-CH<sub>2</sub>-CH<sub>2</sub>-CH<sub>2</sub>- linker chain.

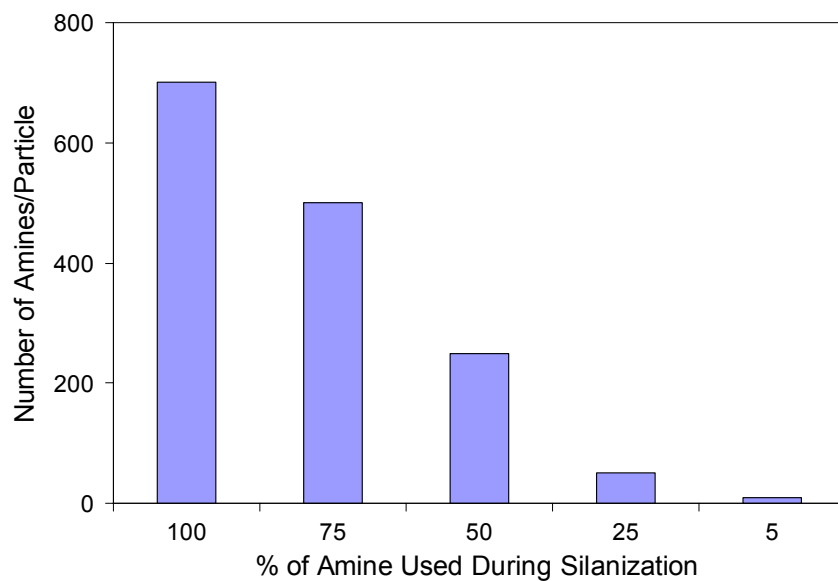

**Figure S3.** Estimated number of primary amines per ZnO particle with mixed surface functional groups. ZnO nanoparticles were silanized with a mixture of AEAPS (primary amine) and dimethylaminopropyltrimethoxysilane. The number of primary amines was estimated by fluorescamine titration.
